# Supplementary material
Source: Springer Nature journal article supplement (https://www.springerprofessional.de/resource/supplementary/13638_2014_969_MOESM3_ESM.pdf/11898904)

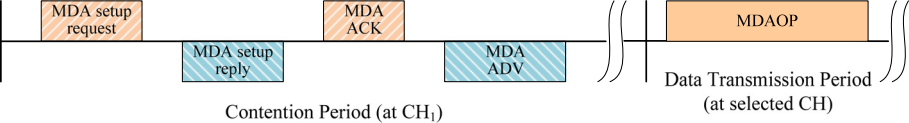

 : MDA control packet sent by the source MP

 : MDA control packet sent by the destination MP

Supplement: MOESM3 [file 11898904]
